# Supplementary material for: AMPK activator O304 improves metabolic and cardiac function, and exercise capacity in aged mice
Source: PubMed Central journal article supplement (PMC8602430; doi:10.1038/s42003-021-02837-0), 2021-11-18
Supplement: 42003_2021_2837_MOESM1_ESM.pdf [file 42003_2021_2837_MOESM1_ESM.pdf]

## Supplementary information

# AMPK activator O304 improves metabolic and cardiovascular function, and exercise capacity in aged mice

Madelene Ericsson<sup>1</sup>, Pär Steneberg<sup>1</sup>, Rakel Nyrén<sup>2</sup>, and Helena Edlund<sup>1</sup>

<sup>1</sup>Umeå Centre for Molecular Medicine  
Umeå University,  
SE-901 87 Umeå, Sweden

<sup>2</sup>Department of Medical Biosciences, Pathology  
Umeå University  
SE-901 87 Umeå, Sweden

**Supplementary figure 1.** Glucose and insulin levels and HOMA-IR in mice fed control diet (CD) and O304-0.25 from 6 months of age.

**Supplementary figure 2.** Western blots

**Supplementary table 1.** Echocardiographic measurements of mice fed CD or O304-0.5 for 6 and 12 months with diet start at 6 months of age.

**Supplementary table 2.** Echocardiographic measurements of 12 months old mice at start and after 1 and 6 months fed CD or O304-0.5.

**Supplementary table 3.** List of antibodies

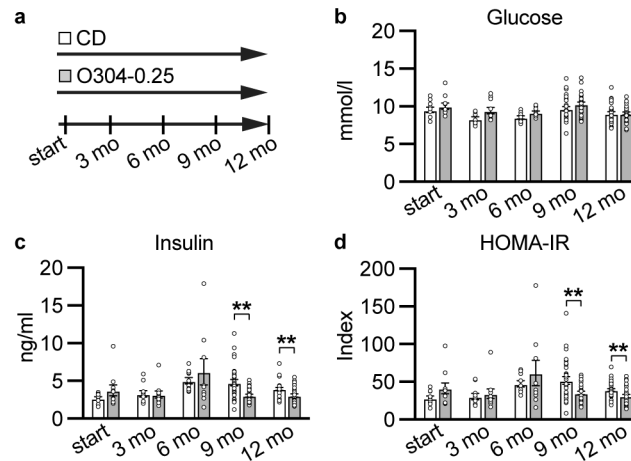

**Supplementary figure 1. 0.25 mg/g O304 attenuates development of insulin resistance in aging mice.** (a) Timeline in months (mo) for mice fed control diet (CD) or CD supplemented with 0.25 mg/g O304 (O304-0.25) from 6 months of age. (b-d) Fasted glucose (b) and insulin (c) levels and HOMA-IR calculations (d) (based on glucose and insulin levels in b and c), in mice fed CD (n=10-30) or O304-0.25 (n=9-27) for 12 months from 6 months of age. Data are presented as mean  $\pm$  s.d. where \*\* P < 0.01 between CD and O304-0.25 groups at time points indicated in the figure (two tailed Mann-Whitney test).

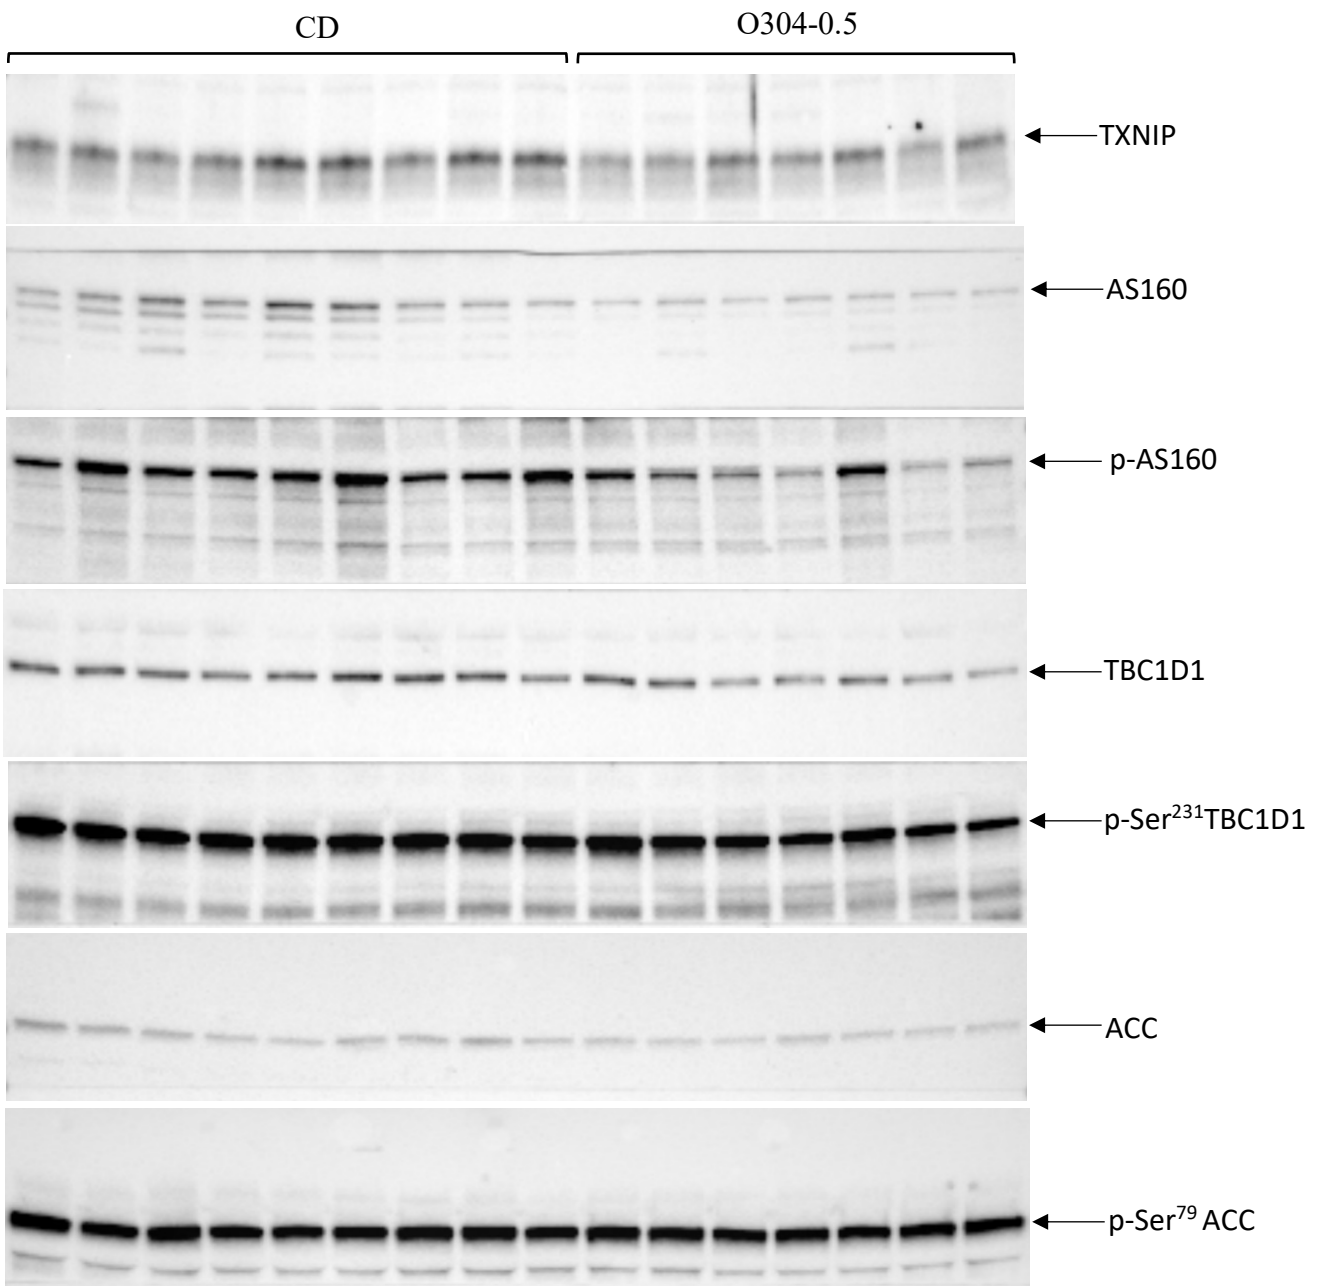

**Supplementary figure 2.** Western blots of calf muscle from western blot analyses of extracts from gastrocnemius muscle in mice fed CD (n= 9) or O304-0.5 (n=7) at 6 months of diet.

**Supplementary table 1.** Echocardiographic measurements of mice fed CD or CD supplemented with 0.5 mg/g O304 (O304-0.5) for 6 and 12 months with diet start at 6 months of age.

| Group           | CD          | O304-0.5       | CD          | O304-0.5       |
|-----------------|-------------|----------------|-------------|----------------|
| Treatment time  | 6 months    |                | 12 months   |                |
| <i>n</i> =      | 9           | 9              | 8           | 8              |
| Body weight (g) | 42.6 ± 4.3  | 41.1 ± 3.1     | 44.3 ± 3.1  | 42.1 ± 3.5     |
| B-mode          |             |                |             |                |
| HR (bpm)        | 446 ± 23    | 374 ± 23***    | 492 ± 15    | 433 ± 46**     |
| SV (μL)         | 21.6 ± 2.89 | 26.8 ± 1.56*** | 20.6 ± 2.39 | 26.6 ± 1.90*** |
| CO (mL/min)     | 9.7 ± 1.58  | 10.0 ± 0.70    | 10.1 ± 1.24 | 11.5 ± 1.26*   |
| EDV (μL)        | 58.3 ± 7.31 | 69.4 ± 10.94*  | 56.7 ± 4.33 | 69.4 ± 5.99*** |
| ESV (μL)        | 36.7 ± 6.39 | 42.2 ± 10.25   | 36.2 ± 3.48 | 42.8 ± 6.44*   |
| EF (%)          | 37.3 ± 4.49 | 39.8 ± 6.68    | 36.2 ± 3.22 | 38.7 ± 4.33    |
| FS (%)          | 9.9 ± 2.15  | 13.0 ± 4.24    | 10.6 ± 3.56 | 12.7 ± 3.61    |
| M-mode          |             |                |             |                |
| AWd (mm)        | 0.60 ± 0.06 | 0.63 ± 0.08    | 0.59 ± 0.06 | 0.59 ± 0.06    |
| AWs (mm)        | 0.77 ± 0.12 | 0.75 ± 0.06    | 0.78 ± 0.12 | 0.77 ± 0.06    |
| LVIDd (mm)      | 4.55 ± 0.16 | 4.99 ± 0.13*** | 4.40 ± 0.27 | 4.79 ± 0.24*   |
| LVIDs (mm)      | 3.66 ± 0.10 | 3.89 ± 0.18**  | 3.56 ± 0.24 | 3.89 ± 0.27*   |
| PWd (mm)        | 0.80 ± 0.08 | 0.75 ± 0.14    | 0.87 ± 0.13 | 0.85 ± 0.15    |
| PWs (mm)        | 0.98 ± 0.09 | 0.90 ± 0.13    | 1.09 ± 0.17 | 1.08 ± 0.16    |

Parasternal long-axis B-mode measurements of left ventricular function. HR, heart rate; SV, stroke volume; CO, cardiac output; EDV, end-diastolic volume; ESV, end-systolic volume; EF, ejection fraction and FS, fractional shortening.

Parasternal long-axis M-mode measurements of left ventricular dimensions. AWd/s, anterior wall thickness in diastole/systole; LVIDd/s, left ventricular inner diameter in diastole/systole and PWd/s, posterior wall thickness diastole/systole.

Data are presented as mean ± s.d. P-values are based on Student's t-test between CD and O304-0.5 groups at respective time point. \* P < 0.05, \*\* P < 0.01 and \*\*\* P < 0.001.

**Supplementary table 2.** Echocardiographic measurements 12 months old mice at start and after 1 and 6 months fed CD or O304-0.5.

| Treatment time  | 0           |             | 1 month      |                   | 6 months      |                   |
|-----------------|-------------|-------------|--------------|-------------------|---------------|-------------------|
| Group           | CD          | O304-0.5    | CD           | O304-0.5          | CD            | O304-0.5          |
| <i>n</i>        | 13          | 13          | 13           | 13                | 11            | 9                 |
| Body weight (g) | 43.0 ± 3.4  | 44.4 ± 4.3  | 43.1 ± 1.9   | 39.2 ± 3.5        | 44.5 ± 2.7    | 41.6 ± 4.5        |
| B-mode          |             |             |              |                   |               |                   |
| HR (bpm)        | 480 ± 28    | 467 ± 35    | 486 ± 52     | 443 ± 31*         | 486 ± 27      | 455 ± 17*         |
| SV (µL)         | 22.5 ± 1.21 | 22.1 ± 1.11 | 22.9 ± 1.38  | 28.7 ± 3.06***### | 20.7 ± 1.44## | 27.8 ± 1.85***### |
| CO (mL/min)     | 10.8 ± 1.13 | 10.3 ± 0.77 | 11.2 ± 1.73  | 12.7 ± 1.48***### | 10.1 ± 1.05   | 12.6 ± 0.67***### |
| FS (%)          | 10.2 ± 3.6  | 9.8 ± 2.25  | 9.8 ± 2.56   | 12.6 ± 2.20***### | 10.3 ± 2.10   | 11.4 ± 3.50       |
| EF (%)          | 39.6 ± 6.5  | 36.0 ± 3.46 | 36.3 ± 3.06# | 41.1 ± 3.68***### | 36.9 ± 3.05   | 42.9 ± 5.42***### |
| EDV (µL)        | 58.0 ± 7.6  | 62.0 ± 4.19 | 63.4 ± 4.6#  | 70.1 ± 7.19***### | 56.7 ± 6.61   | 65.9 ± 8.83*      |
| ESV (µL)        | 35.4 ± 7.7  | 39.8 ± 4.55 | 40.5 ± 4.59  | 41.4 ± 5.78       | 35.9 ± 5.63   | 38.1 ± 8.16       |
| M-mode          |             |             |              |                   |               |                   |
| AWd (mm)        | 0.53 ± 0.03 | 0.50 ± 0.02 | 0.56 ± 0.05  | 0.53 ± 0.03#      | 0.55 ± 0.03   | 0.54 ± 0.04#      |
| AWs (mm)        | 0.63 ± 0.04 | 0.64 ± 0.05 | 0.67 ± 0.05# | 0.66 ± 0.07       | 0.68 ± 0.04#  | 0.65 ± 0.06       |
| LVIDd (mm)      | 4.70 ± 0.22 | 4.80 ± 0.15 | 4.76 ± 0.16  | 5.11 ± 0.27***### | 4.62 ± 0.27   | 4.96 ± 0.41       |
| LVIDs (mm)      | 3.63 ± 0.20 | 3.72 ± 0.09 | 3.63 ± 0.29  | 3.73 ± 0.27       | 3.44 ± 0.23   | 3.66 ± 0.40       |
| PWd (mm)        | 0.75 ± 0.07 | 0.75 ± 0.05 | 0.80 ± 0.08  | 0.74 ± 0.09       | 0.81 ± 0.11   | 0.80 ± 0.11       |
| PWs (mm)        | 0.92 ± 0.04 | 0.95 ± 0.07 | 0.96 ± 0.05# | 0.91 ± 0.10       | 1.01 ± 0.08## | 1.00 ± 0.12       |

Parasternal long-axis B-mode measurements of left ventricular function. HR, heart rate; SV, stroke volume; CO, cardiac output; EDV, end-diastolic volume; ESV, end-systolic volume; EF, ejection fraction and FS, fractional shortening.

Parasternal long-axis M-mode measurements of left ventricular dimensions. AWd/s, anterior wall thickness in diastole/systole; LVIDd/s, left ventricular inner diameter in diastole/systole and PWd/s, posterior wall thickness diastole/systole.

Data are presented as mean ± s.d. P-values are based on Student's t-test between CD and O304-0.5 groups at respective time point where \* P < 0.05, \*\* P < 0.01 and \*\*\* P < 0.001 or within groups compared to start of treatment #p<0.05, ##p<0.01, ###p<0.001.

**Supplementary table 3. Antibodies**

|                      | Antigen                                                     | Species                    | Supplier                                         | Dilution |
|----------------------|-------------------------------------------------------------|----------------------------|--------------------------------------------------|----------|
| Primary antibodies   | p-ACC (Ser-79)                                              | Rabbit                     | Cell signaling (cat. nr. 3661)                   | 1:1000   |
|                      | panACC                                                      | Rabbit                     | Cell signaling (cat. nr. 3662)                   | 1:1000   |
|                      | p-AS160                                                     | Rabbit                     | Cell signaling (cat. nr. 9611)                   | 1:1000   |
|                      | AS160                                                       | Rabbit                     | Cell signaling (cat. nr. 2670)                   | 1:1000   |
|                      | p-TBC1D1 (Ser-231)                                          | Rabbit                     | MerckMillipore (cat. nr. 072268)                 | 1:500    |
|                      | TBC1D1                                                      | Rabbit                     | Cell signaling (cat. nr. 4629)                   | 1:1000   |
|                      | TXNIP                                                       | Rabbit                     | Abcam (cat.nr. 188865)                           | 1:2000   |
| ERG                  | Rabbit                                                      | Cell Marque (cat.nr. 434R) | 1:100                                            |          |
| secondary antibodies | peroxidase-conjugated Affinipure Goat Anti-Rabbit IgG (H+L) |                            | Jackson Laboratories, INC. (cat.nr. 111-035-003) | 1:10000  |
